# Supplementary material for: Solvent responsive healing of guar gum and guar gum–multiwalled carbon nanotube nanocomposite gels prepared in an ionic liquid
Source: Royal Society of Chemistry journal article supplement (doi:10.1039/c3ra42454e), 2013-01-01
Supplement: c3ra42454e.pdf [file c3ra42454e.pdf]

Electronic Supplementary Information

## Solvent responsive healing of guar gum and guar gum-multiwalled carbon nanotube nanocomposite gels prepared in an ionic liquid

Mukesh Sharma,<sup>a</sup> Dibyendu Mondal,<sup>a</sup> Chandrakant Mukesh,<sup>a</sup> and Kamallesh Prasad<sup>a,b,\*</sup>

<sup>a</sup> AcSIR- Central Salt & Marine Chemicals Research Institute, G. B Marg, Bhavnagar-364002 (Gujarat), India

<sup>b</sup> Marine Biotechnology and Ecology Discipline, CSIR-Central Salt & Marine Chemicals Research Institute, G. B Marg, Bhavnagar-364002 (Gujarat), India, Phone No : +91-278-2567760. Fax No. +91-278-2567562 Email: kamlesh@csmcri.org / drkamallesh@gmail.com]

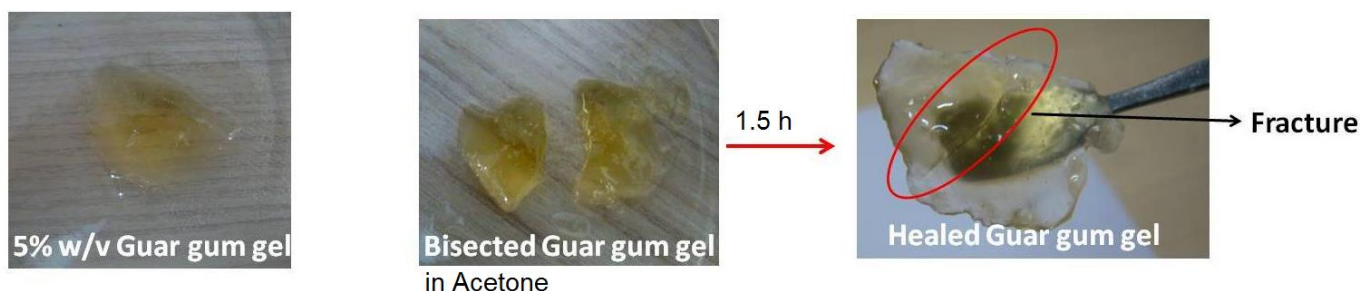

**Fig. S1** Healing of 5% w/v guar gum gel in BmimCl

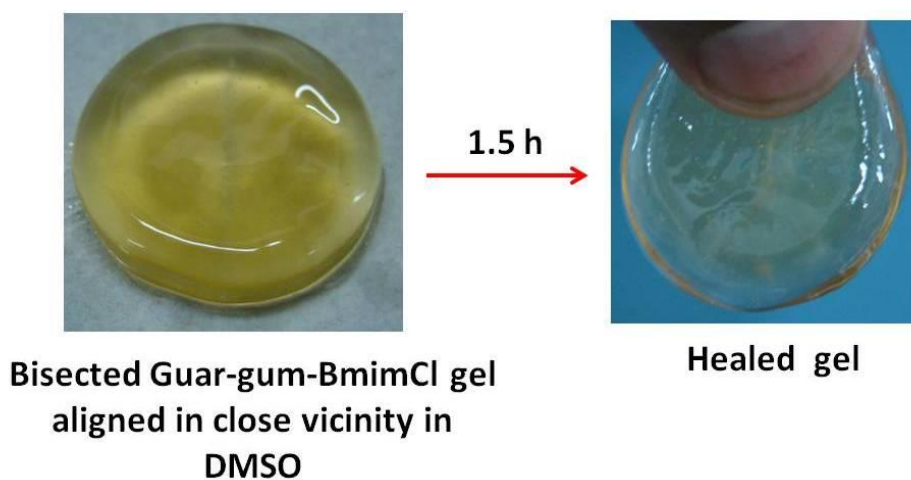

**Fig. S2** Healing of 10% w/v guar gum-BmimCl gel in DMSO

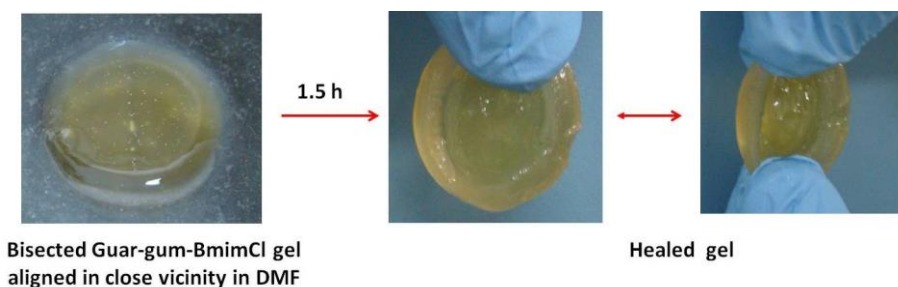

**Fig. S3** Healing of 10% w/v guar gum-BmimCl gel in DMF

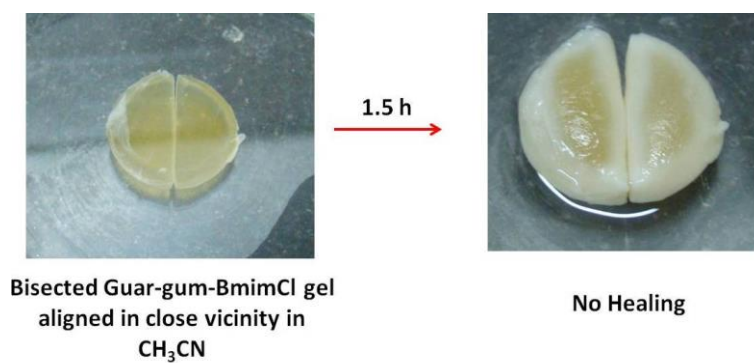

**Fig. S4** Healing of 10% w/v guar gum-BmimCl gel in Acetonitrile.

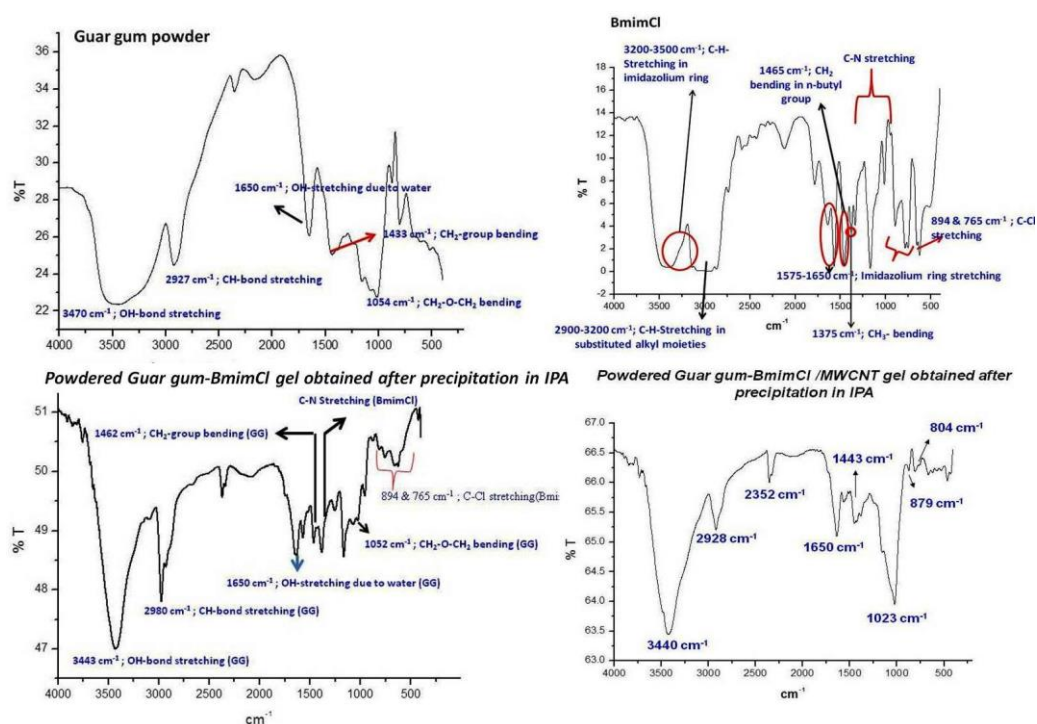

**Fig. S5** FT-IR spectra of pristine guar gum powder, pure BmimCl, powdered guar gum-BmimCl gel obtained after precipitation in iso propyl alcohol and powdered guar gum-BmimCl /MWCNT NC gel obtained after precipitation in iso propyl alcohol

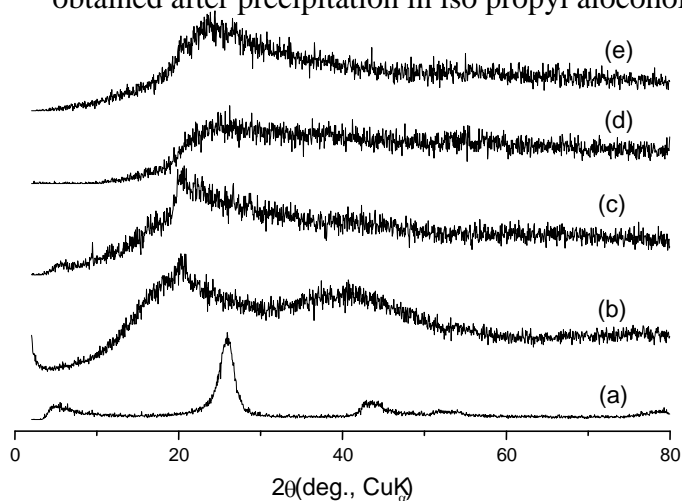

**Fig. S6-** Powder XRD of (a) MWCNT (b) Guar gum powder (c) Guar gum-BmimCl /MWCNT dry composite (d) Guar gum-BmimCl ionic gel and (e) Guar gum-BmimCl/MWCNT NC ionic gel.

100 mg BmimCl neat + Acetone ..... heated to evaporate acetone : Moisture was 4 %

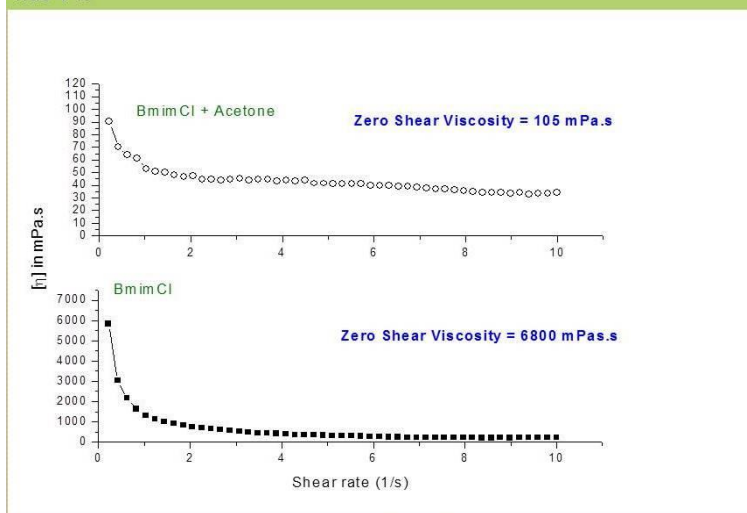

Appropriate amount of Water was added to 100 mg BmimCl neat to make the moisture 4%

**Fig. S7.** Measurement of zero shear viscosity of BmimCl before and after interaction with acetone.

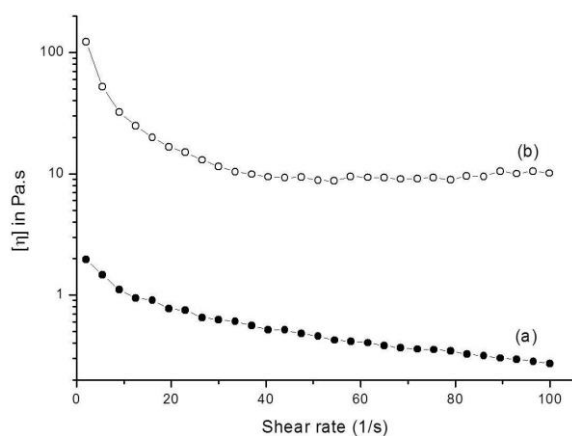

**Fig. S8**– Shear viscosity of (a) Guar gum-BmimCl and (b) Guar-gum-BmimCl /MWCNT NC gel before heating.

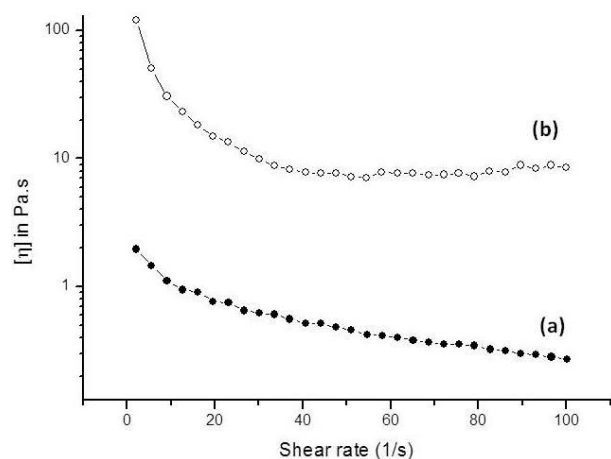

**Fig. S9**– Shear viscosity of (a) Guar gum-BmimCl and (b) Guar-gum-BmimCl /MWCNT NC gel after heating.

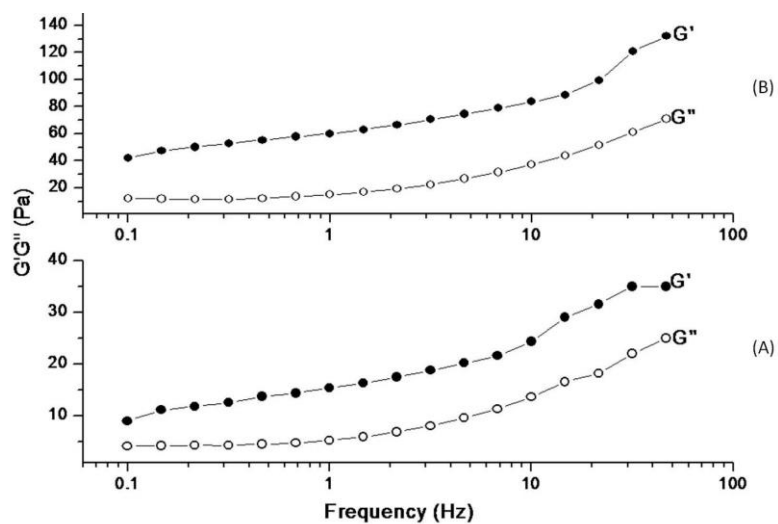

**Fig. S10**– Evaluation of viscoelastic properties with respect to frequency for (A) Guar-gum-BmimCl and (B) Guar-gum-BmimCl /MWCNT NC gel.
